# Supplementary material for: Synthesis, structures and 31P NMR studies of bis(diphenylphosphino)methane adducts of copper and silver thiocarboxylates †
Source: Royal Society of Chemistry journal article supplement (doi:10.1039/b007867k), 2001-01-01

Chemistry of Thiocarboxylates: Synthesis, Structures and 31P NMR studies of Bis(diphenylphosphino)methane adducts of Copper and Silver Thiocarboxylates.

**Theivanayagam C. Deivaraj and Jagadese J. Vittal**

*Department of Chemistry, National University of Singapore,*

*3 Science Drive 3, Singapore 117 543.*

**Supporting Materials:**

**Figure 1:** Variable temperature 31P NMR of compound **1** in CD2Cl2.

**Figure 2:** Variable temperature 31P NMR of compound **2** in CD2Cl2.

**Figure 3:** Variable temperature 31P NMR of [Cu2(-dppm)2](PF6)2

**Figure 4:** Variable temperature 31P NMR of compound **4** in CD2Cl2.


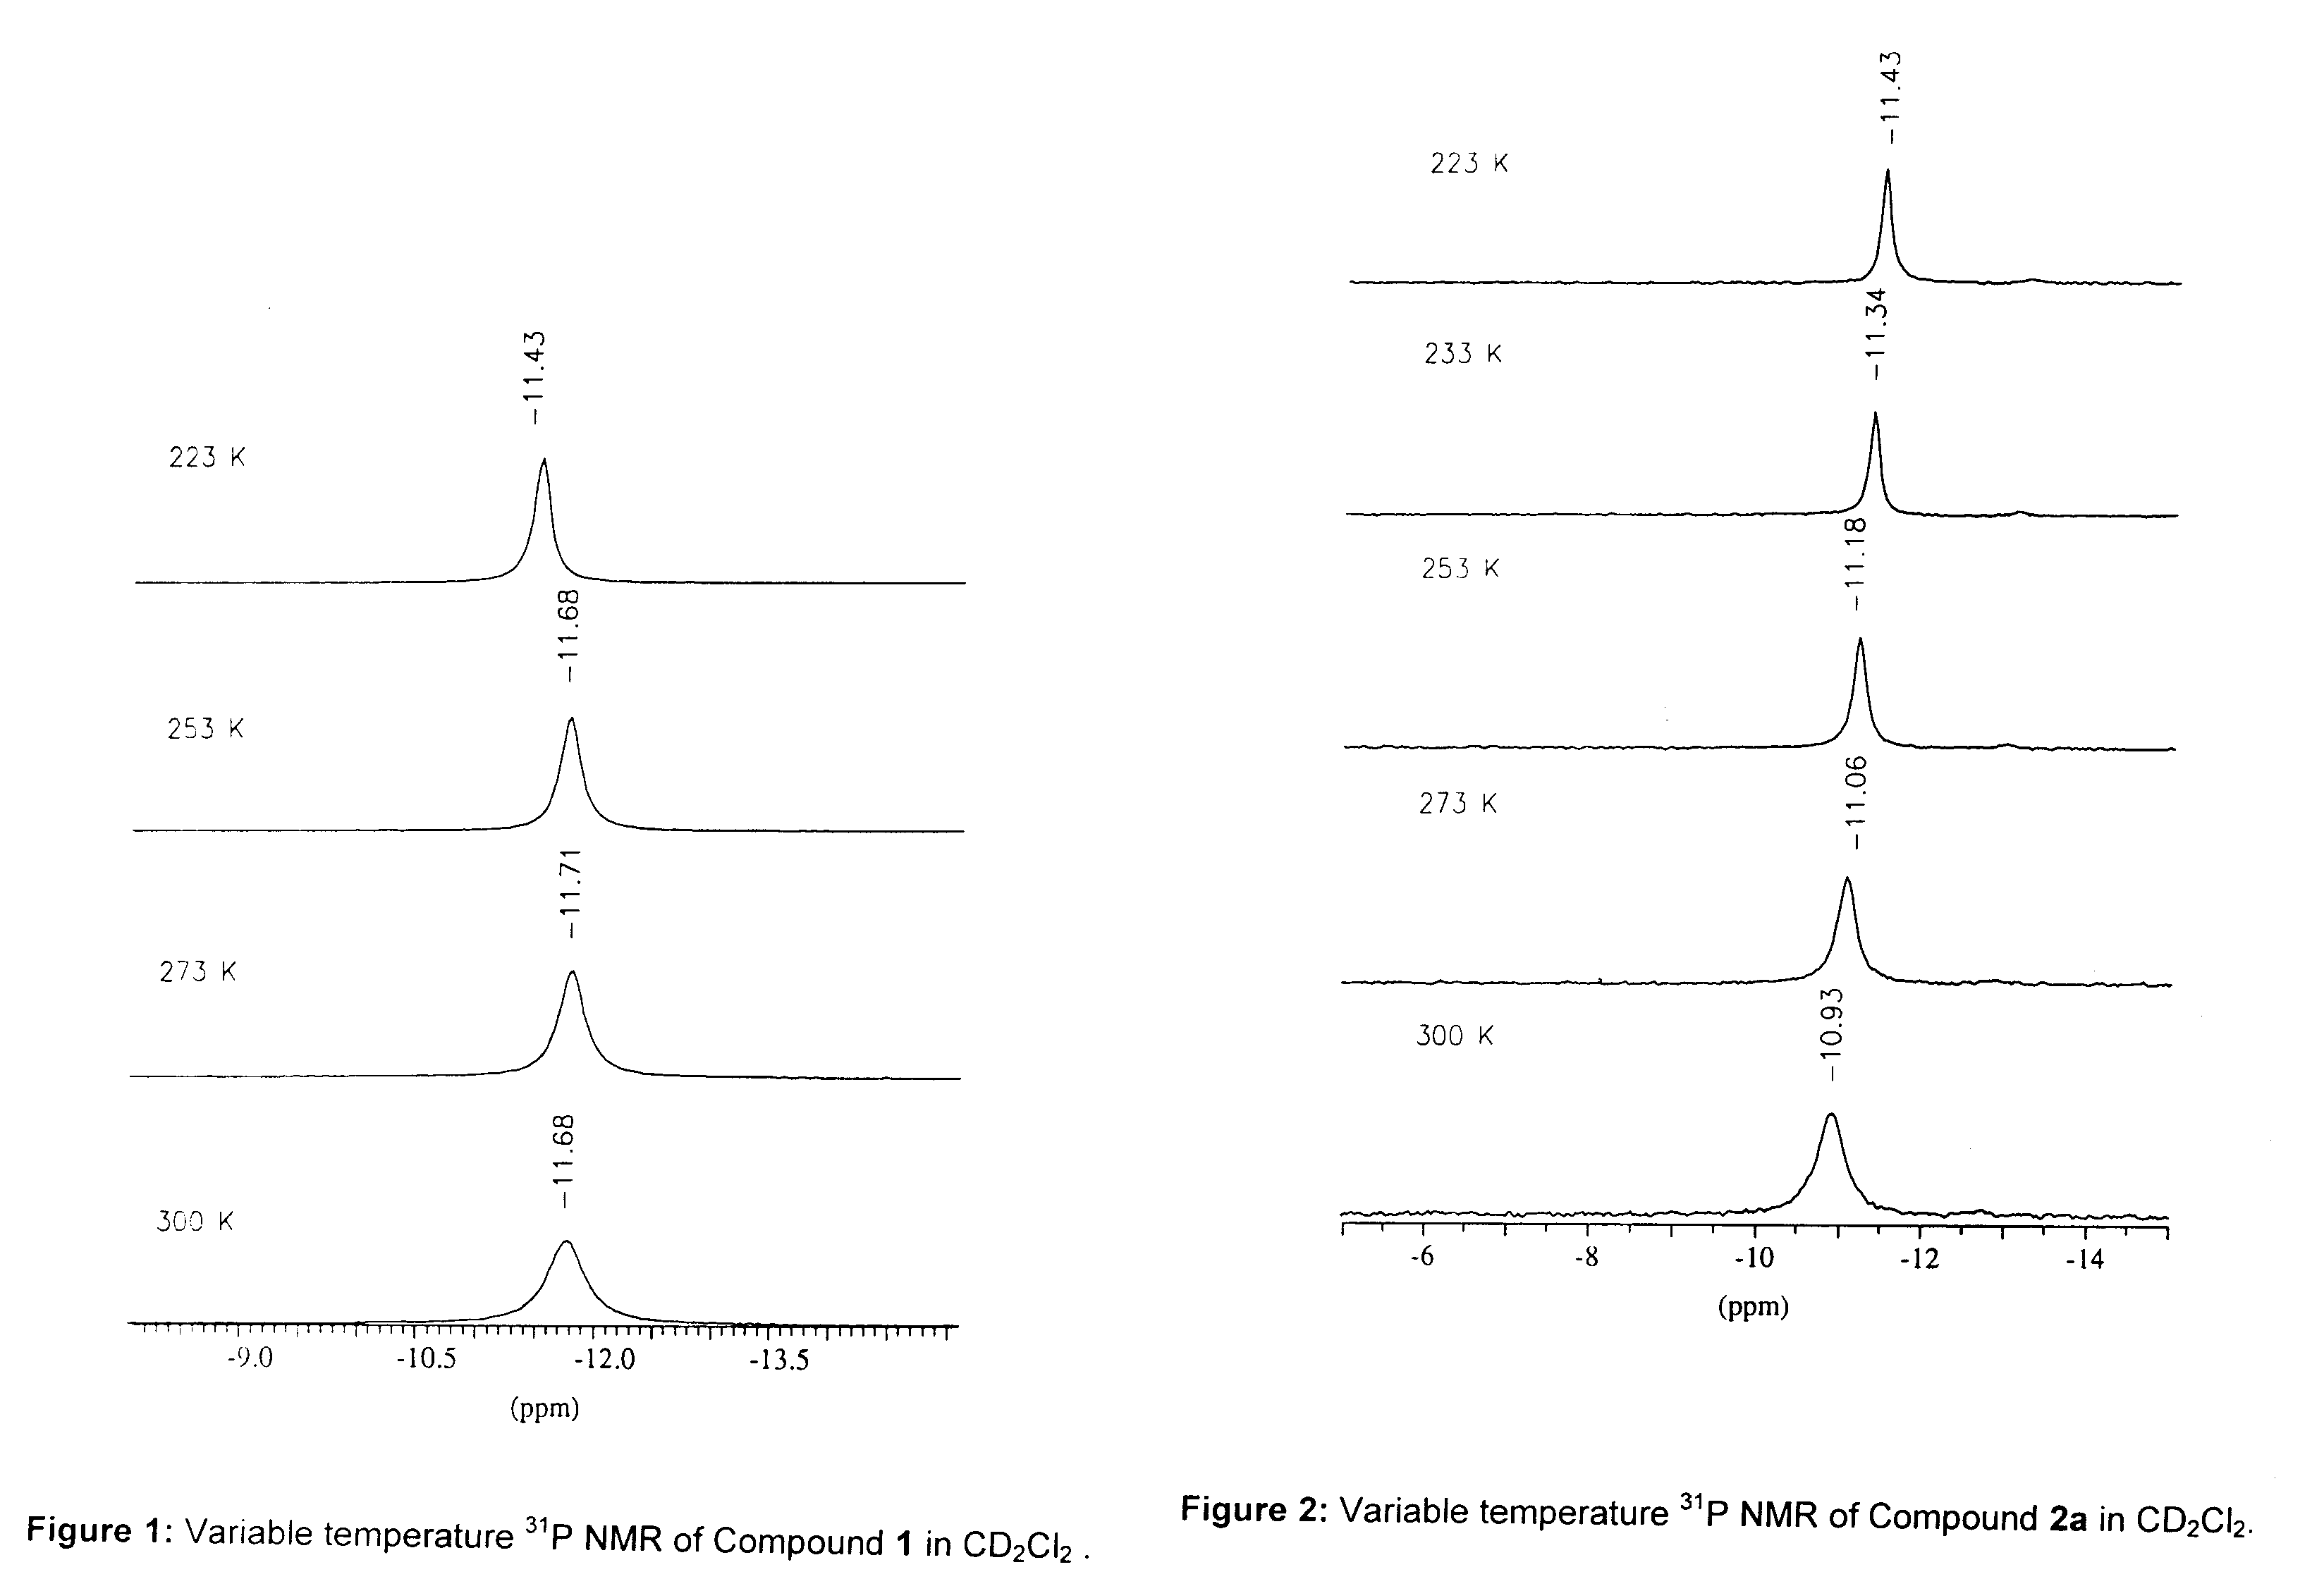


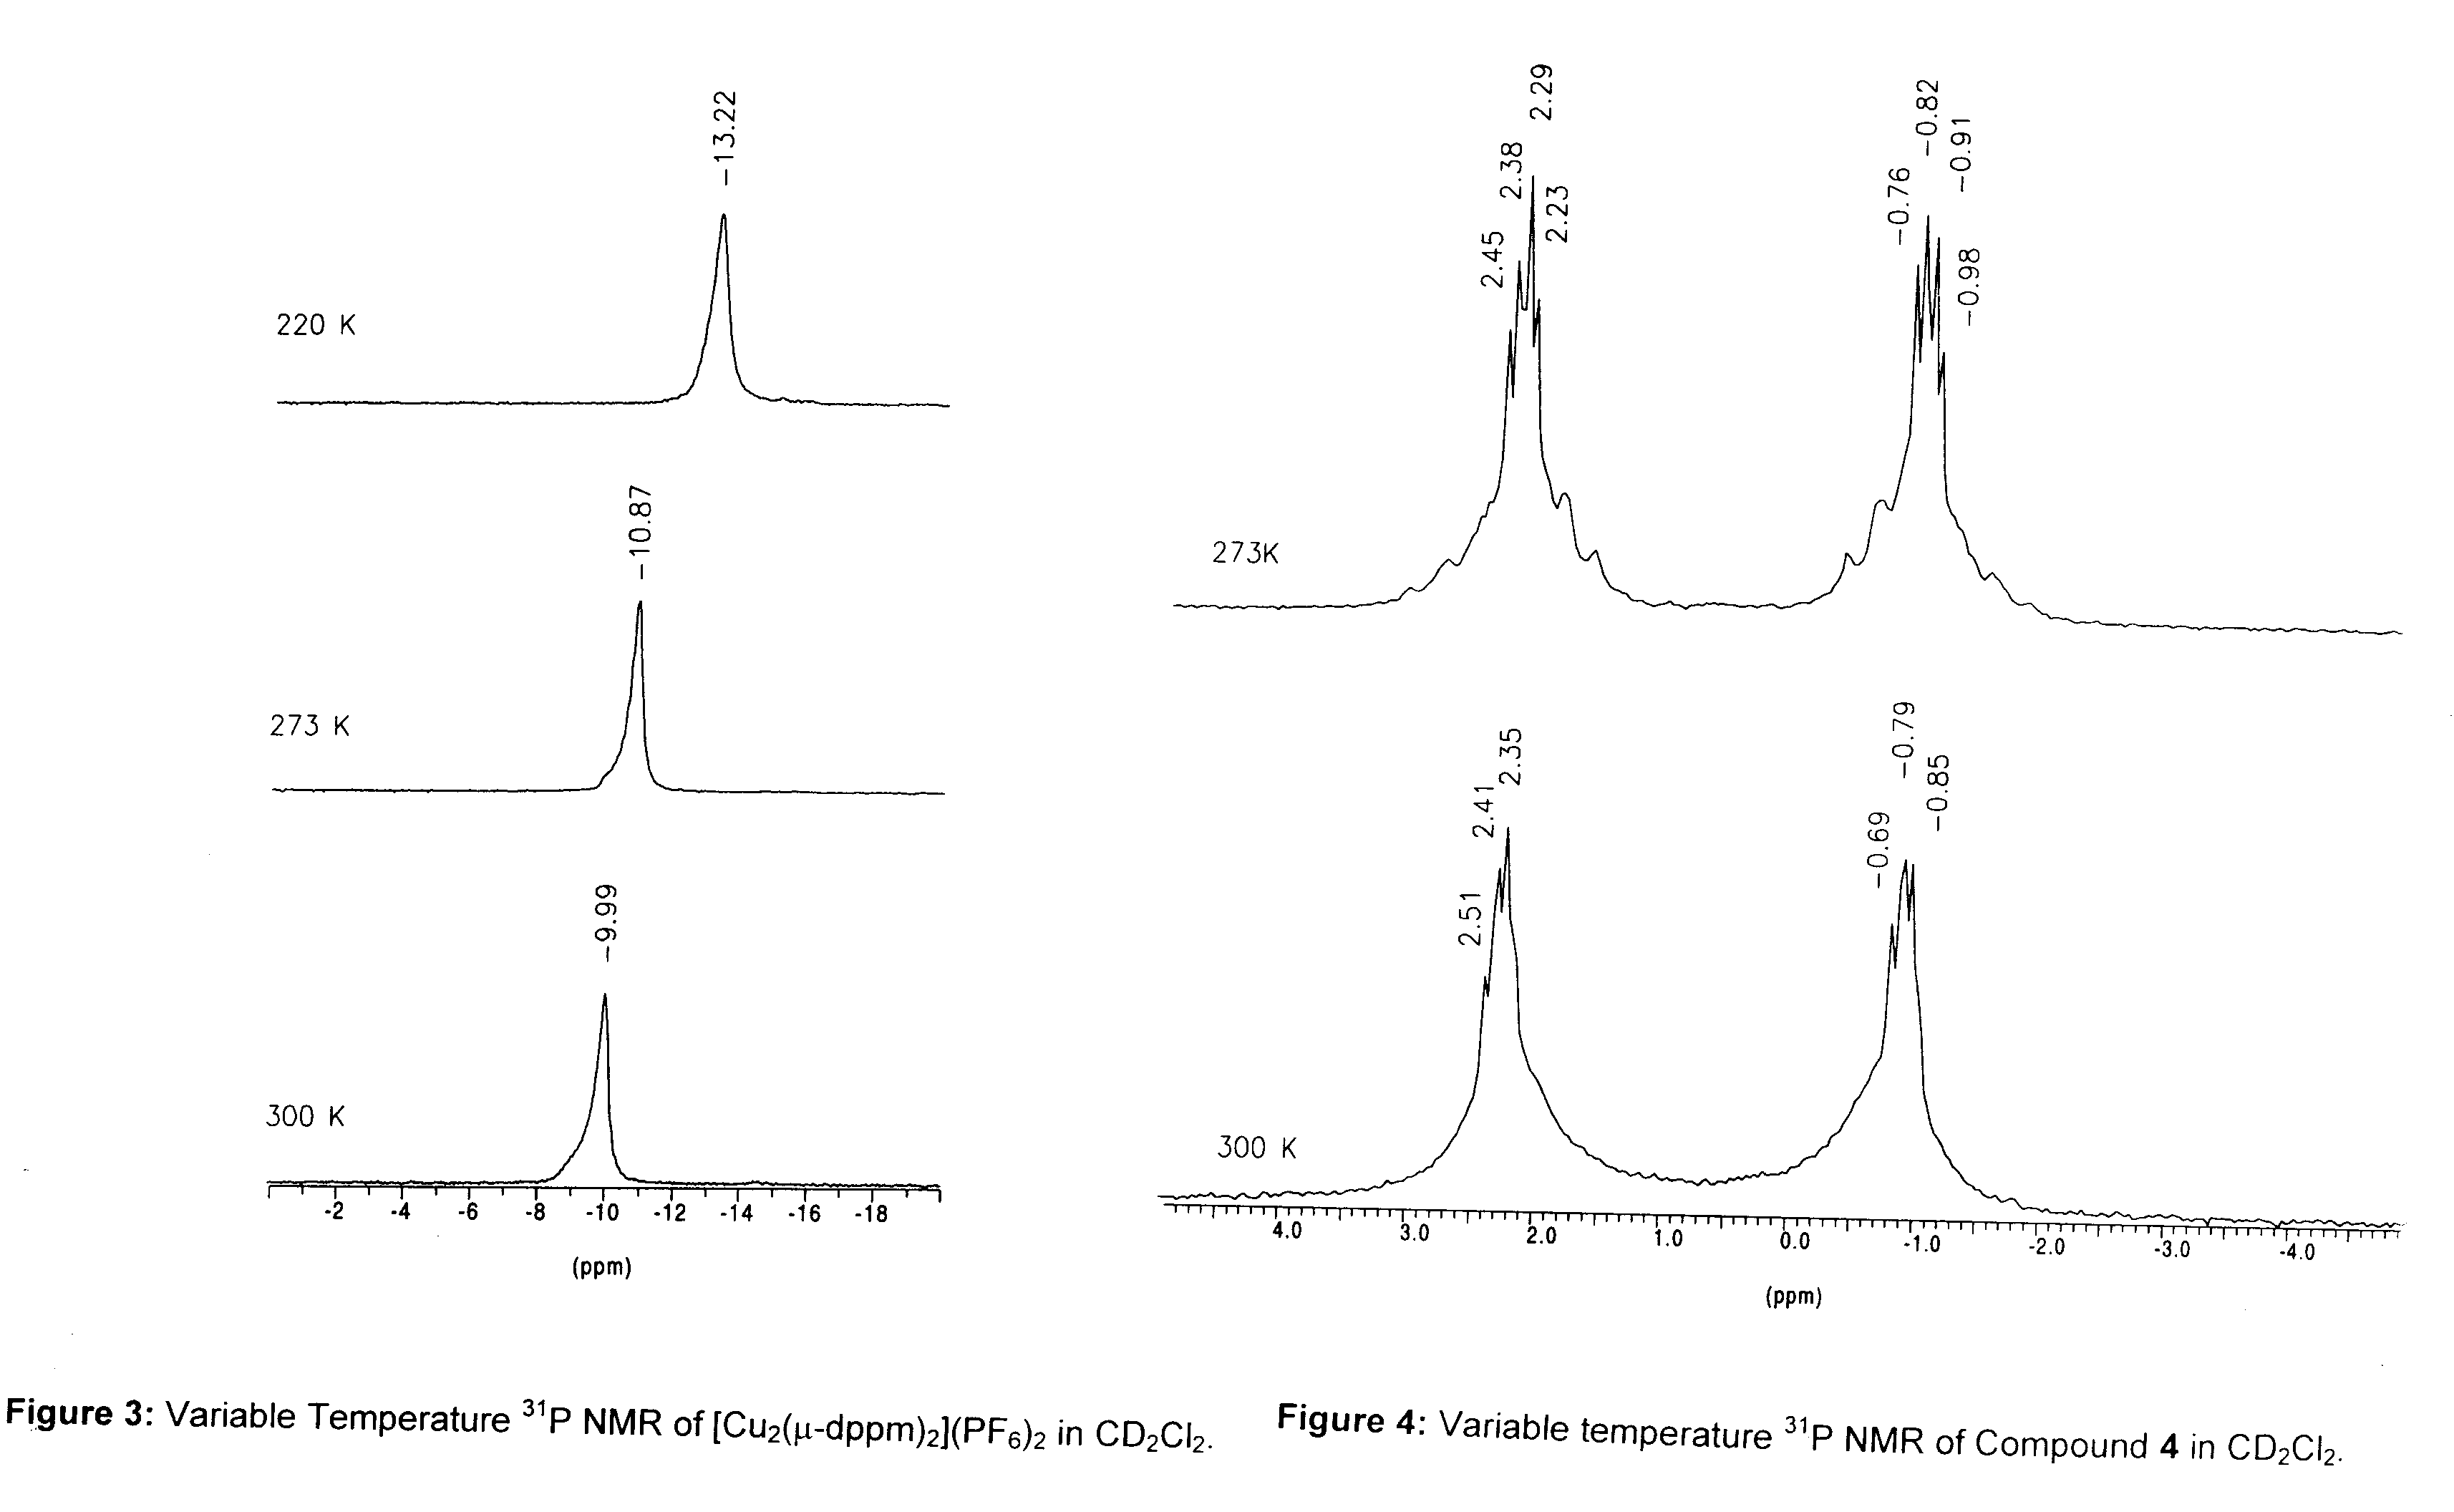

Supplement: b007867k.doc [file b007867k.doc]
